# Supplementary material for: Cyclo[n]carbons and catenanes from different perspectives: disentangling the molecular thread
Source: Royal Society of Chemistry journal article supplement (doi:10.1039/d3cp03887d), 2023-01-01
Supplement: d3cp03887d1.pdf [file d3cp03887d1.pdf]

# Cyclo[ $n$ ]carbons and catenanes from different perspective. Disentangling molecular thread

*Silvia Kozáková, Nissrin Alharzali, Ivan Černušák*

Department of Physical and Theoretical Chemistry, Faculty of Natural Sciences, Comenius  
University in Bratislava, Ilkovičova 6, 84215 Bratislava, Slovakia

## Supporting Information

Table S1 Evolution of in-plane NICS along the stretching of the  $2 \times C_{18}$  thread. Definition of Bq centres is in Figure S3.

| $R_{ij,max}$ [Å] | Strain [%] | $C_{left,outer}$ | $C_{left,inner}$ | $C_{right,inner}$ | $C_{right,outer}$ |
|------------------|------------|------------------|------------------|-------------------|-------------------|
| 11.004           | 7.4        | -30.750          | -45.910          | -45.910           | -30.751           |
| 12.366           | 14.9       | -32.837          | -46.210          | -46.197           | -32.786           |
| 13.166           | 22.3       | -33.390          | -44.854          | -44.866           | -33.372           |
| 13.966           | 29.7       | -33.438          | -42.464          | -42.421           | -33.373           |
| 14.665           | 36.2       | -33.016          | -42.653          | -42.689           | -32.966           |
| 15.365           | 42.7       | -32.348          | -34.537          | -34.536           | -32.305           |
| 16.000           | 48.6       | -25.111          | -34.823          | -34.836           | -27.114           |
| 16.761           | 55.7       | -19.736          | -20.196          | -19.863           | -15.859           |
| 17.360           | 61.2       | -15.727          | 0.010            | 0.491             | -13.278           |

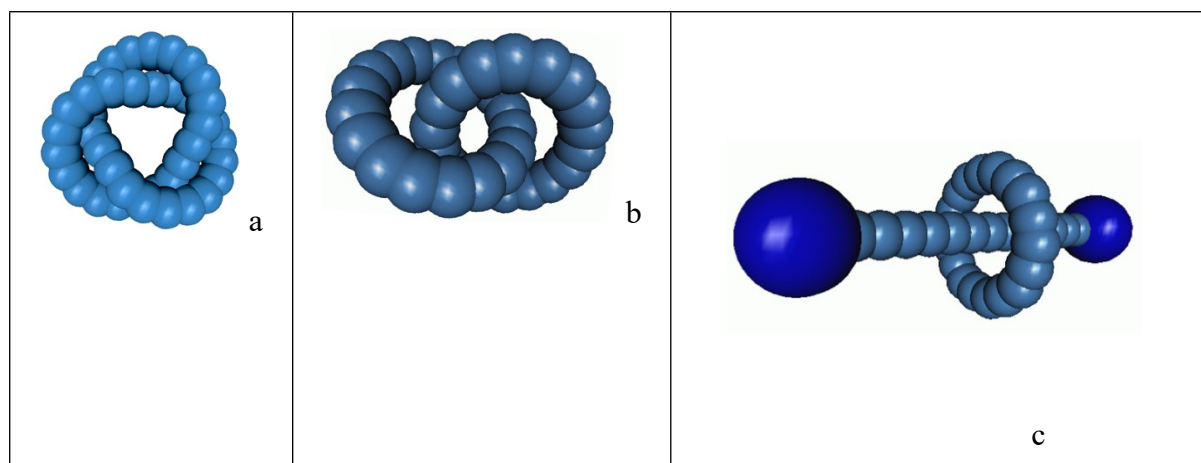

Figure S1. Three examples of mechanically interlocked molecules (MIMs): a) knot; b) catenane; c) rotaxane.

| $C_n$    | Results of AdNDP analysis |                         |                             |
|----------|---------------------------|-------------------------|-----------------------------|
|          | $\sigma$ orbitals         | $\pi$ orbitals in plane | $\pi$ orbitals out of plane |
| $C_6$    |                           |                         |                             |
| $C_8$    |                           |                         |                             |
| $C_{10}$ |                           |                         |                             |
| $C_{12}$ |                           |                         |                             |

|          |                                                                                     |                                                                                     |                                                                                       |
|----------|-------------------------------------------------------------------------------------|-------------------------------------------------------------------------------------|---------------------------------------------------------------------------------------|
| $C_{14}$ |    |    |    |
| $C_{16}$ |    |    |    |
| $C_{18}$ |    |    |    |
| $C_{20}$ |   |   |   |
| $C_{22}$ |  |  |  |
| $C_{24}$ |  |  |  |
| $C_{26}$ |  |  |  |

|          |                                                                                     |                                                                                     |                                                                                       |
|----------|-------------------------------------------------------------------------------------|-------------------------------------------------------------------------------------|---------------------------------------------------------------------------------------|
| $C_{28}$ |    |    |    |
| $C_{30}$ |    |    |    |
| $C_{32}$ |    |    |    |
| $C_{34}$ |   |   |   |
| $C_{36}$ |  |  |  |
| $C_{38}$ |  |  |  |
| $C_{40}$ |  |  |  |

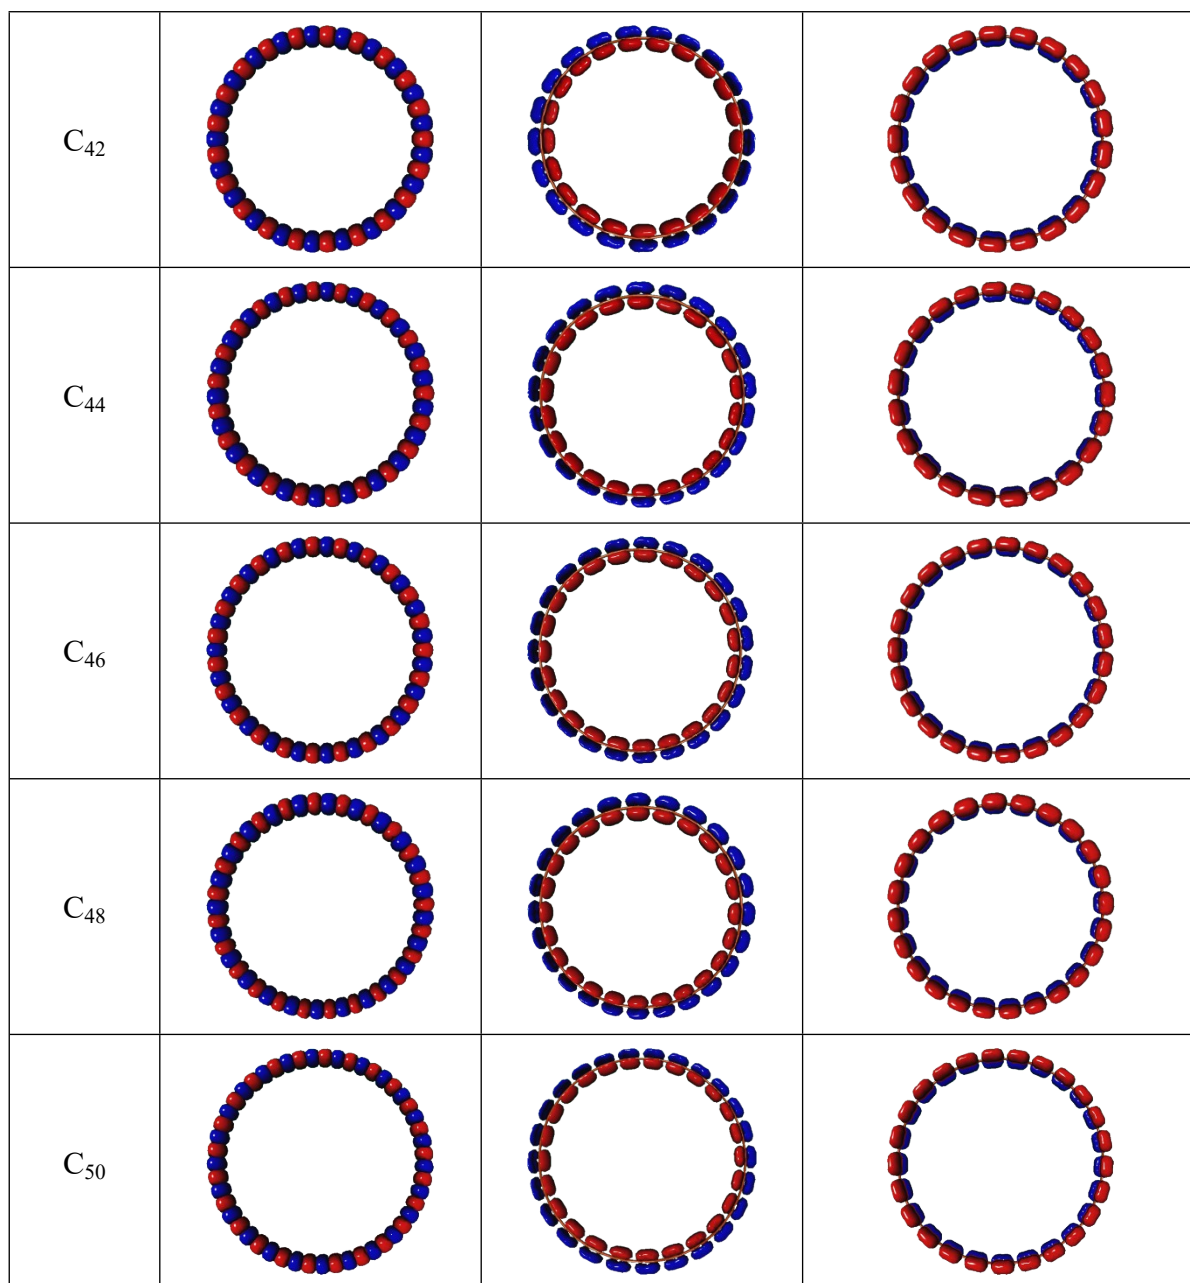

Figure S2. Complete gallery of AdNDP analysis for cyclo[ $n$ ]carbons,  $n = 6 - 50$ , from geometries optimized at  $\omega$ B97XD/6-31+G\* level – orbitals  $\sigma$  and  $\pi$  orbitals (in and out of plane). Contour value 0.1 was adopted for each picture.

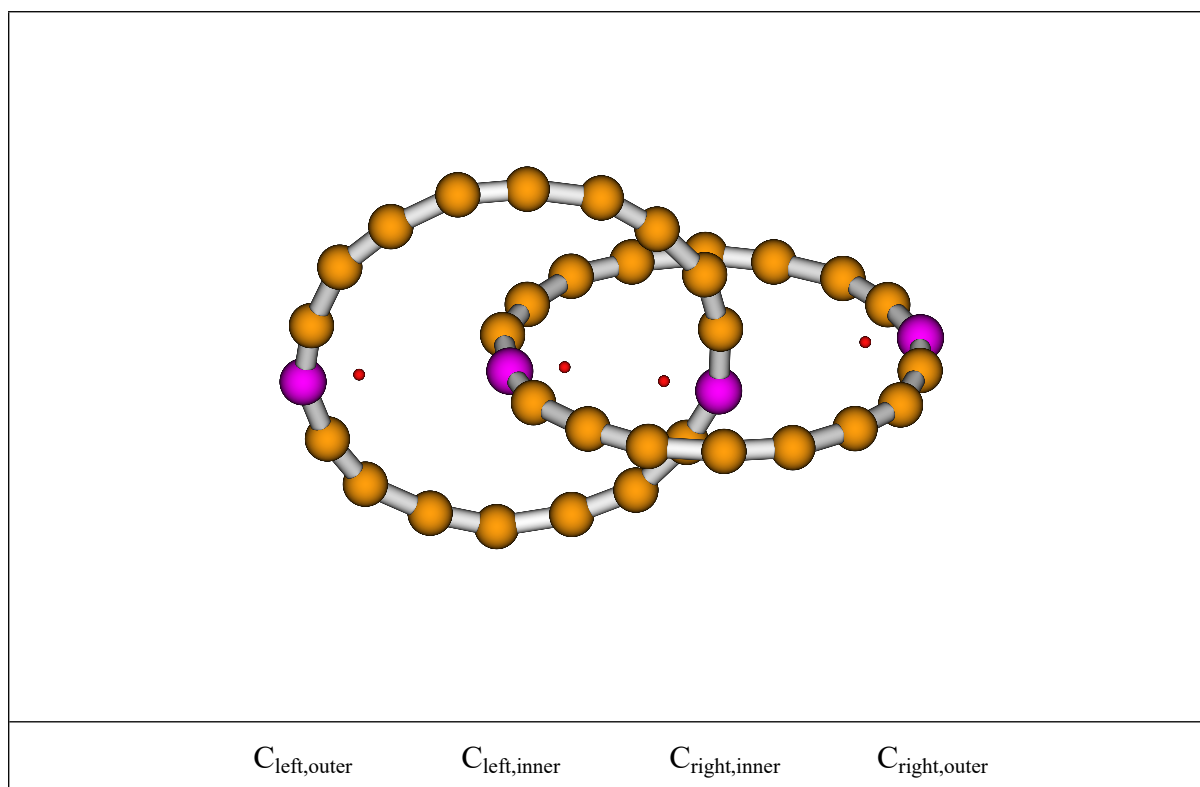

Figure S3. Definition of Bq centers (red dots) lying in the ring plane and adjacent to peripheral carbon atoms (magenta circles) for model catenane  $2x\text{C}_{18}$ .
